# Supplementary material
Source: MDPI journal article supplement (https://www.mdpi.com/2079-3197/10/9/156)
Supplement: s1 [file s1]

Table S1. Five-top papers for each estimated topic, based on a topic-document probability matrix. DOI (digital object identifier).

| Topic | Title                                                                                                                                                                                     | DOI                                   | Probability |
|-------|-------------------------------------------------------------------------------------------------------------------------------------------------------------------------------------------|---------------------------------------|-------------|
| t_1   | Update on use of chloroquine/hydroxychloroquine to treat coronavirus disease 2019 (covid-19).                                                                                             | 10.5582/bst.2020.03072                | 0.9540      |
| t_1   | Efficacy of favipiravir in covid-19 treatment: a multi-center randomized study.                                                                                                           | 10.1007/s00705-021-04956-9            | 0.9534      |
| t_1   | An investigation into the beneficial effects of high-dose interferon beta 1-a, compared to low-dose interferon beta 1-a in severe covid-19: the coviferon ii randomized controlled trial. | 10.1016/j.intimp.2021.107916          | 0.9330      |
| t_1   | Convalescence plasma treatment of covid-19: results from a prematurely terminated randomized controlled open-label study in southern Sweden.                                              | 10.1186/s13104-021-05847-7            | 0.9276      |
| t_1   | Triple therapy with hydroxychloroquine, azithromycin, and ciclesonide for covid-19 pneumonia.                                                                                             | 10.1016/j.jmii.2020.09.003            | 0.9272      |
| t_2   | Hand hygiene knowledge and perception among the healthcare workers during the covid-19 pandemic in qassim, Saudi Arabia: a cross-sectional survey.                                        | 10.3390/healthcare9121627             | 0.9888      |
| t_2   | Did iranians respect health measures during nowruz holidays? A study on iranians' knowledge. attitude and practice toward covid-19.                                                       | 10.15167/2421-4248/jpmh2020.61.4.1576 | 0.9866      |
| t_2   | Covid-19 knowledge, attitude and frequent hand hygiene practices among taxi drivers and associated factors in urban areas of Ethiopia.                                                    | 10.1371/journal.pone.0253452          | 0.9856      |
| t_2   | Knowledge, attitudes and practices of the chinese public with respect to coronavirus disease (covid-19): an online cross-sectional survey.                                                | 10.1186/s12889-020-09961-2            | 0.9849      |
| t_2   | Healthcare workers' knowledge. attitude. and practice regarding personal protective equipment for the prevention of covid-19.                                                             | 10.2147/JMDH.S293717                  | 0.9844      |
| t_3   | Satisfaction with and feasibility of prenatal counseling via telemedicine: a prospective cohort study.                                                                                    | 10.1089/tmj.2021.0309                 | 0.9621      |
| t_3   | Increasing pediatric audiology services via telehealth.                                                                                                                                   | 10.1055/s-0041-1731694                | 0.9594      |
| t_3   | Delivering an advice and guidance service in neurology.                                                                                                                                   | 10.1136/practneurol-2021-003100       | 0.9550      |
| t_3   | The value of physical examination in the era of telemedicine.                                                                                                                             | 10.4997/JRCPE.2021.122                | 0.9529      |
| t_3   | Rapid introduction of virtual consultation in a hospital-based consultant-led antenatal clinic to minimise exposure of pregnant women to covid-19.                                        | 10.1136/bmjoq-2021-001622             | 0.9518      |
| t_4   | Bnt162b2 vaccination elicits strong serological immune responses against sars-cov-2 including variants of concern in elderly convalescents.                                               | 10.3389/fimmu.2021.743422             | 0.9820      |

| Topic | Title                                                                                                                                                                                             | DOI                              | Probability |
|-------|---------------------------------------------------------------------------------------------------------------------------------------------------------------------------------------------------|----------------------------------|-------------|
| t_4   | Evaluation of the quantiferon sars-cov-2 assay to assess cellular immunogenicity of the bnt162b2 mrna covid-19 vaccine in individuals with low and high humoral response.                         | 10.1080/21645515.2021.1991710    | 0.9812      |
| t_4   | Immunogenicity of a heterologous prime-boost covid-19 vaccination with mrna and inactivated virus vaccines compared with homologous vaccination strategy against sars-cov-2 variants.             | 10.3390/vaccines10010072         | 0.9801      |
| t_4   | Immunogenicity of anti-sars-cov-2 vaccines in common variable immunodeficiency.                                                                                                                   | 10.1007/s10875-021-01174-5       | 0.9794      |
| t_4   | Prospective cohort study of the kinetics of specific antibodies to sars-cov-2 infection and to four sars-cov-2 vaccines available in Serbia, and vaccine effectiveness: a 3-month interim report. | 10.3390/vaccines9091031          | 0.9793      |
| t_5   | Automatic covid-19 detection using exemplar hybrid deep features with x-ray images.                                                                                                               | 10.3390/ijerph18158052           | 0.9910      |
| t_5   | Autocovnet: unsupervised feature learning using autoencoder and feature merging for detection of covid-19 from chest x-ray images.                                                                | 10.1016/j.bbe.2021.09.004        | 0.9901      |
| t_5   | Truncating a densely connected convolutional neural network with partial layer freezing and feature fusion for diagnosing covid-19 from chest x-rays.                                             | 10.1016/j.mex.2021.101408        | 0.9894      |
| t_5   | Run length encoding based wavelet features for covid-19 detection in x-rays.                                                                                                                      | 10.1259/bjro.20200028            | 0.9882      |
| t_5   | Learning-to-augment strategy using noisy and denoised data: improving generalizability of deep cnn for the detection of covid-19 in x-ray images.                                                 | 10.1016/j.compbiomed.2021.104704 | 0.9877      |
| t_6   | Impacts of socio-economic determinants, spatial distance and climate factors on the confirmed cases and deaths of covid-19 in china.                                                              | 10.1371/journal.pone.0255229     | 0.9908      |
| t_6   | The effect of control measures on covid-19 transmission in South Korea.                                                                                                                           | 10.1371/journal.pone.0249262     | 0.9908      |
| t_6   | Impact of Wuhan lockdown on the spread of covid-19 in china: a study based on the data of population mobility.                                                                                    | 10.3724/zdxbyxb-2021-0021        | 0.9907      |
| t_6   | Use of public data to describe covid-19 contact tracing in Hubei province and non-Hubei provinces in china between 20 january and 29 february 2020.                                               | 10.5365/wpsar.2021.12.3.808      | 0.9904      |
| t_6   | Dynamics of covid-19 pandemic in India and Pakistan: a metapopulation modelling approach.                                                                                                         | 10.1016/j.idm.2021.10.001        | 0.9900      |
| t_7   | Lessons from learners: adapting medical student education during and post covid-19.                                                                                                               | 10.1097/ACM.0000000000004148     | 0.9916      |
| t_7   | Penn access summer scholars program: a mixed method analysis of a virtual offering of a premedical diversity summer enrichment program.                                                           | 10.1080/10872981.2021.1905918    | 0.9914      |
| t_7   | Exploring the perceptions of the educational environment in online acupuncture learning during the covid-19 pandemic.                                                                             | 10.1177/09645284211056657        | 0.9908      |

| Topic | Title                                                                                                                                                                                            | DOI                             | Probability |
|-------|--------------------------------------------------------------------------------------------------------------------------------------------------------------------------------------------------|---------------------------------|-------------|
| t_7   | Student perceptions of academic engagement and student-teacher relationships in problem-based learning.                                                                                          | 10.3389/fpsyg.2021.713057       | 0.9899      |
| t_7   | Online family medicine training amid the covid-19 crisis in ksa: a mixed-method study.                                                                                                           | 10.1016/j.jtumed.2021.12.001    | 0.9899      |
| t_8   | Clinical characteristics and risk factors for mortality of covid-19 patients with diabetes in Wuhan, china: a two-center, retrospective study.                                                   | 10.2337/dc20-0598               | 0.9914      |
| t_8   | Incidence and risk factors for acute kidney injury and its effect on mortality in patients hospitalized from covid-19.                                                                           | 10.1016/j.mayocpiqo.2020.07.003 | 0.9912      |
| t_8   | Type 2 diabetes and covid-19-related mortality in the critical care setting: a national cohort study in England, march-july 2020.                                                                | 10.2337/dc20-1444               | 0.9907      |
| t_8   | History of heart failure in patients with coronavirus disease 2019: insights from a French registry.                                                                                             | 10.1016/j.acvd.2021.04.003      | 0.9903      |
| t_8   | The characteristics and clinical course of patients with covid-19 who received invasive mechanical ventilation in osaka, japan.                                                                  | 10.1016/j.jid.2020.10.051       | 0.9901      |
| t_9   | Covid-19 and conjunctivitis: a meta-analysis.                                                                                                                                                    | 10.1177/25158414211003368       | 0.8958      |
| t_9   | Reporting and methodological quality of covid-19 systematic reviews needs to be improved: an evidence mapping.                                                                                   | 10.1016/j.jclinepi.2021.02.021  | 0.8684      |
| t_9   | Why are ethnic minorities worse affected?                                                                                                                                                        | 10.1016/S0262-4079(20)30790-9   | 0.8585      |
| t_9   | Neuroimaging findings in covid-19: a narrative review.                                                                                                                                           | 10.1016/j.neulet.2020.135529    | 0.8585      |
| t_9   | Epidemiology, methodological quality, and reporting characteristics of systematic reviews and meta-analyses on coronavirus disease 2019: a cross-sectional study.                                | 10.1097/MD.00000000000027950    | 0.8518      |
| t_10  | Characteristics of covid-19 myocarditis with and without multisystem inflammatory syndrome.                                                                                                      | 10.1016/j.amjcard.2021.12.031   | 0.9858      |
| t_10  | Abdominal us in pediatric inflammatory multisystem syndrome associated with covid-19.                                                                                                            | 10.1148/radiol.211737           | 0.9678      |
| t_10  | Extracardiac imaging findings in covid-19-associated multisystem inflammatory syndrome in children.                                                                                              | 10.1007/s00247-020-04929-1      | 0.9655      |
| t_10  | Longitudinal assessment of cardiac outcomes of multisystem inflammatory syndrome in children associated with covid-19 infections.                                                                | 10.1161/JAHA.121.023251         | 0.9636      |
| t_10  | Heterogeneity of post-covid impairment: interim analysis of a prospective study from Czechia.                                                                                                    | 10.1186/s12985-021-01546-8      | 0.9621      |
| t_11  | Modelling studies reveal the importance of the c-terminal inter motif loop of nsp1 as a promising target site for drug discovery and screening of potential phytochemicals to combat sars-cov-2. | 10.1016/j.jmgm.2021.107920      | 0.9926      |
| t_11  | Ace2-independent interaction of sars-cov-2 spike protein with human epithelial cells is inhibited by unfractionated heparin.                                                                     | 10.3390/cells10061419           | 0.9916      |

| Topic | Title                                                                                                                                                                                                                          | DOI                                    | Probability |
|-------|--------------------------------------------------------------------------------------------------------------------------------------------------------------------------------------------------------------------------------|----------------------------------------|-------------|
| t_11  | A molecular dynamics simulation study of the ace2 receptor with screened natural inhibitors to identify novel drug candidate against covid-19.                                                                                 | 10.7717/peerj.11171                    | 0.9911      |
| t_11  | Synthesis and identification of novel potential molecules against covid-19 main protease through structure-guided virtual screening approach.                                                                                  | 10.1007/s12010-021-03615-8             | 0.9906      |
| t_11  | Identifying the natural polyphenol catechin as a multi-targeted agent against sars-cov-2 for the plausible therapy of covid-19: an integrated computational approach.                                                          | 10.1093/bib/bbaa378                    | 0.9905      |
| t_12  | Rapid sars-cov-2 antigen detection assay in comparison with real-time rt-pcr assay for laboratory diagnosis of covid-19 in Thailand.                                                                                           | 10.1186/s12985-020-01452-5             | 0.9923      |
| t_12  | Clinical evaluation of self-collected saliva by quantitative reverse transcription-pcr (rt-qpcr), direct rt-qpcr, reverse transcription-loop-mediated isothermal amplification, and a rapid antigen test to diagnose covid-19. | 10.1128/JCM.01438-20                   | 0.9914      |
| t_12  | Analytical and clinical performance of droplet digital pcr in the detection and quantification of sars-cov-2.                                                                                                                  | 10.1007/s40291-021-00547-1             | 0.9902      |
| t_12  | Evaluation of the commercially available lightmix™ modular e-gene kit using clinical and proficiency testing specimens for sars-cov-2 detection.                                                                               | 10.1016/j.jcv.2020.104476              | 0.9895      |
| t_12  | Pooling nasopharyngeal swab specimens to improve testing capacity for sars-cov-2 by real-time rt-pcr.                                                                                                                          | 10.1186/s12575-021-00156-6             | 0.9895      |
| t_13  | Do pre-existing anxiety-related and mood disorders differentially impact covid-19 stress responses and coping?                                                                                                                 | 10.1016/j.janxdis.2020.102271          | 0.9923      |
| t_13  | Psychological correlates of poor sleep quality among U.S. young adults during the covid-19 pandemic.                                                                                                                           | 10.1016/j.sleep.2020.12.009            | 0.9913      |
| t_13  | The role of equanimity in mediating the relationship between psychological distress and social isolation during covid-19.                                                                                                      | 10.1016/j.jad.2021.09.087              | 0.9908      |
| t_13  | Resilience and the role of depressed and anxious mood in the relationship between perceived social isolation and perceived sleep quality during the covid-19 pandemic.                                                         | 10.1007/s12529-020-09945-x             | 0.9907      |
| t_13  | Age differences in stress, life changes, and social ties during the covid-19 pandemic: implications for psychological well-being.                                                                                              | 10.1093/geront/gnaa204                 | 0.9907      |
| t_14  | The impact of the novel coronavirus pandemic on gastrointestinal operative volume in the united states.                                                                                                                        | 10.1007/s00464-021-08477-z             | 0.9893      |
| t_14  | Care as usual: an acceptable strategy to apply during the covid-19 pandemic in a French tertiary gynecologic oncology department.                                                                                              | 10.3389/fonc.2021.653009               | 0.9887      |
| t_14  | The effect of the covid-19 lockdown on hand trauma surgery utilization.                                                                                                                                                        | 10.1302/2633-1462.110.BJO-2020-0133.R1 | 0.9881      |
| t_14  | Covid-19 and changes in neurosurgical workload in the United Kingdom.                                                                                                                                                          | 10.1016/j.wneu.2021.01.094             | 0.9877      |

---

| Topic | Title                                                                                                                                                      | DOI                            | Probability |
|-------|------------------------------------------------------------------------------------------------------------------------------------------------------------|--------------------------------|-------------|
| t_14  | Impact of the coronavirus disease 2019 pandemic on volume of thoracic aortic surgery on a national level.                                                  | 10.1093/ejcts/ezab550          | 0.9872      |
| t_15  | Covid-19 pathology on various organs and regenerative medicine and stem cell-based interventions.                                                          | 10.3389/fcell.2021.675310      | 0.9906      |
| t_15  | Endothelial cell dysfunction, coagulation, and angiogenesis in coronavirus disease 2019 (covid-19).                                                        | 10.1016/j.mvr.2021.104188      | 0.9905      |
| t_15  | The impact of the renin-angiotensin-aldosterone system on inflammation, coagulation, and atherothrombotic complications, and to aggravated covid-19.       | 10.3389/fphar.2021.640185      | 0.9904      |
| t_15  | Sars-cov-2 induces mitochondrial dysfunction and cell death by oxidative stress/inflammation in leukocytes of covid-19 patients.                           | 10.1080/10715762.2021.2005247  | 0.9902      |
| t_15  | Perspectives on mesenchymal stem/progenitor cells and their derivatives as potential therapies for lung damage caused by covid-19.                         | 10.4252/wjsc.v12.i9.1013       | 0.9896      |
| t_16  | Community health workers at the dawn of a new era: 2. Planning, coordination, and partnerships.                                                            | 10.1186/s12961-021-00753-7     | 0.9927      |
| t_16  | Building the evidence base for global health policy: the need to strengthen institutional networks, geographical representation, and global collaboration. | 10.1136/bmjgh-2021-006852      | 0.9904      |
| t_16  | Industrial policy for sustainable human development in the post-covid19 era.                                                                               | 10.1016/j.worlddev.2020.105215 | 0.9903      |
| t_16  | Application of supply chain approach to improving hazard-resilient health services: framework analysis for asean and options of implementation.            | 10.1007/s40847-020-00134-w     | 0.9903      |
| t_16  | Best practice guidance for creation and management of innovations in health care and information and communications technologies.                          | 10.1089/omi.2021.0043          | 0.9888      |

---
