# Supplementary material
Source: MDPI journal article supplement (https://www.mdpi.com/2079-3197/10/9/156)
Supplement: s1 [file s1]

Archive with 1 entries (1 files):
- computation-1864121-supplementary.pdf
